# Supplementary material for: Therapeutic Potential of Deflamin against Colorectal Cancer Development and Progression
Source: MDPI journal article supplement (doi:10.3390/cancers14246182), 2022-12-14
Supplement: s1 [file s1]

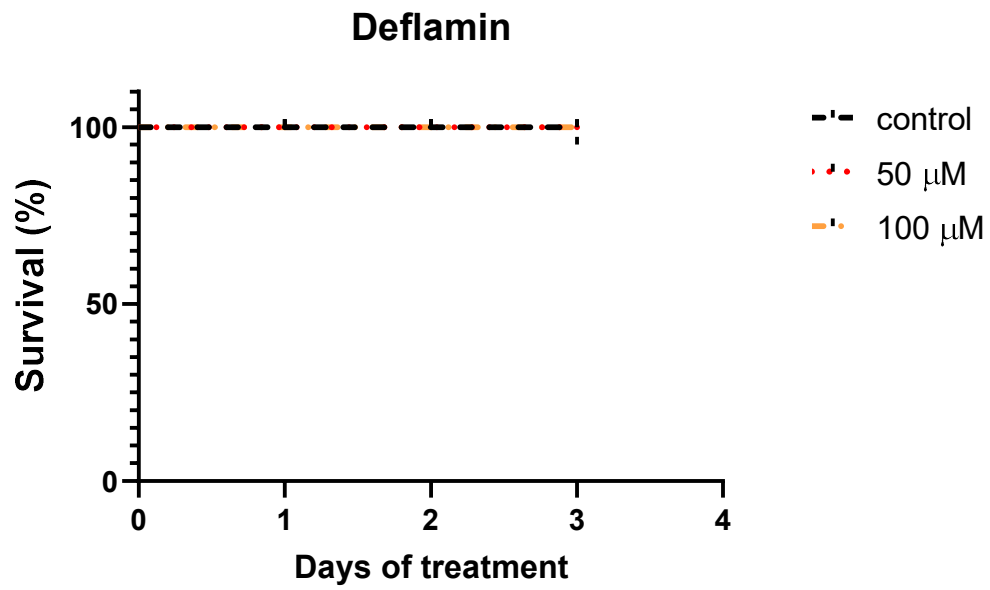

**Supplementary Figure S1.** Zebrafish lethality curves of the acute toxicity assay. At 72hpf zebrafish embryos were exposed to increased concentrations of deflamin (n=20) and mortality was evaluated during 72h of treatment.
